# Supplementary material for: Cannabidiol-loaded microparticles embedded in a porous hydrogel matrix for biomedical applications
Source: J Mater Sci Mater Med. 2024 Feb 14;35(1):14. doi: 10.1007/s10856-023-06773-9 (PMC10866797; doi:10.1007/s10856-023-06773-9)
Supplement: Supplementary file 1 — Supporting Information [file 10856_2023_6773_MOESM1_ESM.docx]

**Supporting Information**

**Cannabidiol-loaded microparticles embedded in a porous hydrogel matrix for biomedical applications**

Carla David a,b, , Jaqueline F. de Souza c, Adriana F. Silva b, Guillermo Grazioli d, Andressa S. Barboza b, Rafael G. Lund b, André R. Fajardo c, Rafael R. Moraes b*

a Biopathological Research Group, Faculty of Dentistry (GIBFO), University of the Andes, Mérida, Venezuela

b Graduate Program in Dentistry, Universidade Federal de Pelotas, Pelotas, Brazil

c Laboratory of Technology and Development of Composites and Polymeric Materials – LaCoPol, Universidade Federal de Pelotas, Pelotas, Brazil

d Department of Dental Materials, Universidad de la República, Montevideo, Uruguay

**Fig. S1** Result of analysis of 10 µL of 5% CBD oil with a gas chromatograph coupled to a mass spectrophotometer.
